# Supplementary material
Source: MDPI journal article supplement (https://www.mdpi.com/2673-9984/2/1/23)
Supplement: s1 [file s1]

ECU  
2021

The 1st Electronic Conference on Universe

22-28 FEBRUARY 2021 | ONLINE

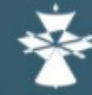

universe

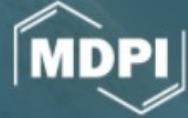

# Lambda Perturbations and Instability of Keplerian Orbits in the Expanding Universe

[*Grav. & Cosmol.*, v.26, p.307 (2020)]

**Yurii V. Dumin**

*Sternberg Astronomical Institute of Lomonosov Moscow State University,  
Space Research Institute of Russian Academy of Sciences,  
Faculty of Physics, HSE University*

`dumin@yahoo.com, dumin@sai.msu.ru`

# Introduction

- Since the concept of Dark Energy (*i.e.*, effective Lambda-term in the General Relativity equations) became a commonly-accepted paradigm in cosmology, numerous authors tried to analyze its effects on the dynamics of celestial bodies.
  - Unfortunately, such calculations were usually performed only in the framework of static Schwarzschild–deSitter metric, which does not possess the adequate cosmological asymptotics at infinity. As a result, only the conservative perturbations of the orbits were taken into account.
- The aim of the present work is to use the more realistic Robertson–Walker asymptotics and, thereby, to analyze also the nonconservative (secular) perturbations of the Keplerian orbits.
- As an appropriate mathematical tool, we shall employ the modified Kottler metric, which was derived in our earlier paper [Yu.V. Dumin. *Phys. Rev. Lett.*, v.98, p.059001 (2007)]; and the equations of motion of a test body will be solved in this metric.

# Mathematical Formalism - 1

- Schwarzschild solution of the General Relativity equations was generalized to the case of the Lambda-term by [Kottler](#) as early as 1918:

$$ds^2 = - \left( 1 - \frac{2GM}{c^2 r'} - \frac{\Lambda r'^2}{3} \right) c^2 dt'^2 + \left( 1 - \frac{2GM}{c^2 r'} - \frac{\Lambda r'^2}{3} \right)^{-1} dr'^2 + r'^2 (d\theta^2 + \sin^2 \theta d\varphi^2) ;$$

and this metric is often called also [Schwarzschild–deSitter](#) solution.

- Unfortunately, since the above-written solution was derived well before the birth of the modern cosmology, it suffers from [a lack of the adequate cosmological asymptotics at infinity](#).
  - Taking into account such asymptotics should be especially important in the case of Dark-Energy-dominated Universe: Since the Dark Energy (or Lambda-term) is present everywhere, it could affect the motion of celestial bodies, in principle, at any spatial scale.

## Mathematical Formalism - 2

- The original Kottler solution was reduced to the Robertson–Walker cosmological coordinates in our earlier work [Yu.V. Dumin, *Phys. Rev. Lett.*, 98, 059001 (2007)]:

$$ds^2 = g_{tt} c^2 dt^2 + 2 g_{tr} c dt dr + g_{rr} dr^2 + g_{\theta\theta} d\theta^2 + g_{\varphi\varphi} d\varphi^2,$$

$$g_{tt} = \frac{-\left(1 - \frac{r_g}{r'} - \frac{r'^2}{r_0^2}\right)^2 + \left(1 - \frac{r'^2}{r_0^2}\right)^2 \frac{r'^2}{r_0^2}}{\left(1 - \frac{r_g}{r'} - \frac{r'^2}{r_0^2}\right)\left(1 - \frac{r'^2}{r_0^2}\right)}, \quad g_{rr} = \frac{\left(1 - \frac{r'^2}{r_0^2}\right)^2 - \left(1 - \frac{r_g}{r'} - \frac{r'^2}{r_0^2}\right)^2 \frac{r'^2}{r_0^2}}{\left(1 - \frac{r_g}{r'} - \frac{r'^2}{r_0^2}\right)\left(1 - \frac{r'^2}{r_0^2}\right)} \frac{r'^2}{r^2},$$

$$g_{tr} = \frac{\left(1 - \frac{r'^2}{r_0^2}\right)^2 - \left(1 - \frac{r_g}{r'} - \frac{r'^2}{r_0^2}\right)^2}{\left(1 - \frac{r_g}{r'} - \frac{r'^2}{r_0^2}\right)\left(1 - \frac{r'^2}{r_0^2}\right)} \frac{r'}{r_0} \frac{r'}{r}, \quad g_{\theta\theta} = g_{\varphi\varphi}/\sin^2\theta = r'^2,$$

$$r' = a_0 \exp\left(\frac{ct}{r_0}\right) r, \quad r_g = 2GM/c^2, \quad r_0 = \sqrt{3/\Lambda}.$$

- Up to the first non-vanishing terms of  $r_g$  and  $1/r_0$ , this metric can be written as

$$g_{tt} \approx -\left[1 - \frac{2GM}{c^2 r} \left(1 - \frac{c\sqrt{\Lambda} t}{\sqrt{3}}\right)\right], \quad g_{rr} \approx \left[1 + \frac{2GM}{c^2 r} \left(1 - \frac{c\sqrt{\Lambda} t}{\sqrt{3}}\right)\right] \left(1 + \frac{2c\sqrt{\Lambda} t}{\sqrt{3}}\right),$$

$$g_{tr} \approx \frac{4GM\sqrt{\Lambda}}{\sqrt{3}c^2}, \quad g_{\theta\theta} = g_{\varphi\varphi}/\sin^2\theta \approx r^2 \left(1 + \frac{2c\sqrt{\Lambda} t}{\sqrt{3}}\right).$$

## Mathematical Formalism - 3

- Equations of motion of a test particle in the field of the massive central body are

$$2 \left[ 1 - \frac{r_g}{r} \left( 1 - \frac{t}{r_0} \right) \right] \ddot{t} - 4 \frac{r_g}{r_0} \ddot{r} + \frac{r_g}{r_0} \frac{1}{r} \dot{t}^2 + 2 \frac{r_g}{r^2} \left( 1 - \frac{t}{r_0} \right) \dot{t} \dot{r} \\ + \frac{1}{r_0} \left( 2 + \frac{r_g}{r} \right) \dot{r}^2 + 2 \frac{r^2}{r_0} \left( \dot{\theta}^2 + \sin^2 \theta \dot{\varphi}^2 \right) = 0 ,$$

$$4 \frac{r_g}{r_0} \ddot{t} + 2 \left[ 1 + 2 \frac{t}{r_0} + \frac{r_g}{r} \left( 1 + \frac{t}{r_0} \right) \right] \ddot{r} + \frac{r_g}{r^2} \left( 1 - \frac{t}{r_0} \right) \dot{t}^2 + \frac{2}{r_0} \left( 2 + \frac{r_g}{r} \right) \dot{t} \dot{r} \\ - \frac{r_g}{r^2} \left( 1 + \frac{t}{r_0} \right) \dot{r}^2 - 2 r \left( 1 + 2 \frac{t}{r_0} \right) \left( \dot{\theta}^2 + \sin^2 \theta \dot{\varphi}^2 \right) = 0 ,$$

$$r \left( 1 + 2 \frac{t}{r_0} \right) \ddot{\theta} + 2 \frac{r}{r_0} \dot{t} \dot{\theta} + 2 \left( 1 + 2 \frac{t}{r_0} \right) \dot{r} \dot{\theta} \\ - r \left( 1 + 2 \frac{t}{r_0} \right) \sin \theta \cos \theta \dot{\varphi}^2 = 0 ,$$

$$r \left( 1 + 2 \frac{t}{r_0} \right) \sin \theta \ddot{\varphi} + 2 \frac{r}{r_0} \sin \theta \dot{t} \dot{\varphi} + 2 \left( 1 + 2 \frac{t}{r_0} \right) \sin \theta \dot{r} \dot{\varphi} \\ + 2 r \left( 1 + 2 \frac{t}{r_0} \right) \cos \theta \dot{\theta} \dot{\varphi} = 0 .$$

- For example, in the Earth–Moon system:  $r_g \sim 10^{-2}$  m,  $R_0 \sim 10^9$  m,  $r_0 \sim 10^{27}$  m; *i.e.*, the characteristic scales differ from each other by many orders of magnitude.

# Results of Numerical Integration - 1

- To simplify calculations, we assume that difference between the characteristic scales of the problem (Schwarzschild radius, the initial orbital radius, and deSitter radius) is not so much as in reality, e.g.  $r_g = 0.01$ ,  $R_0 = 1$ :

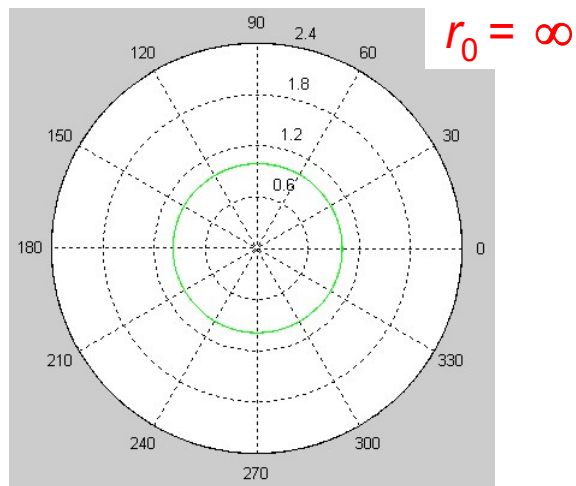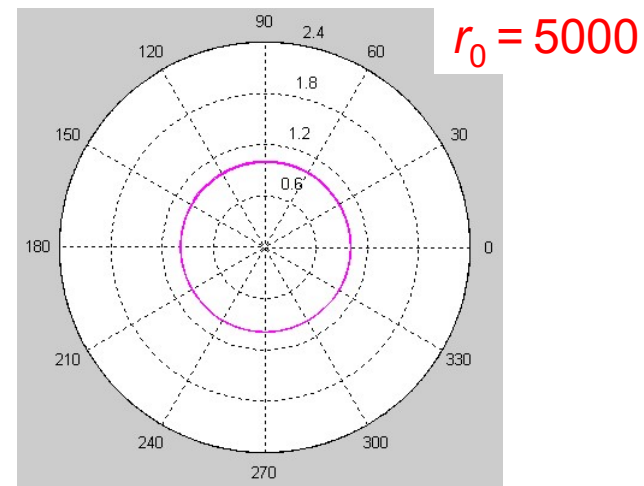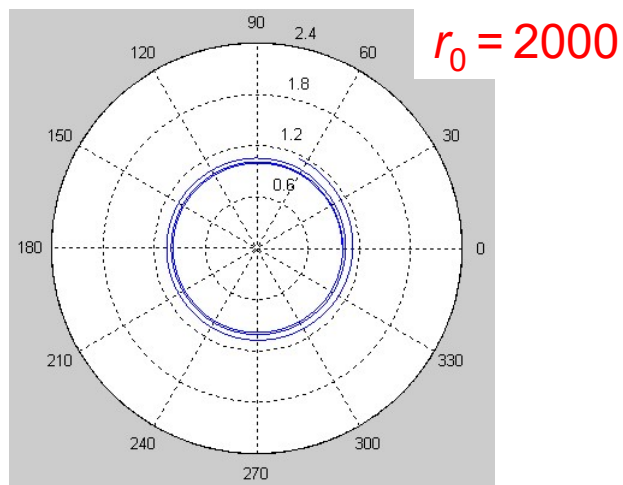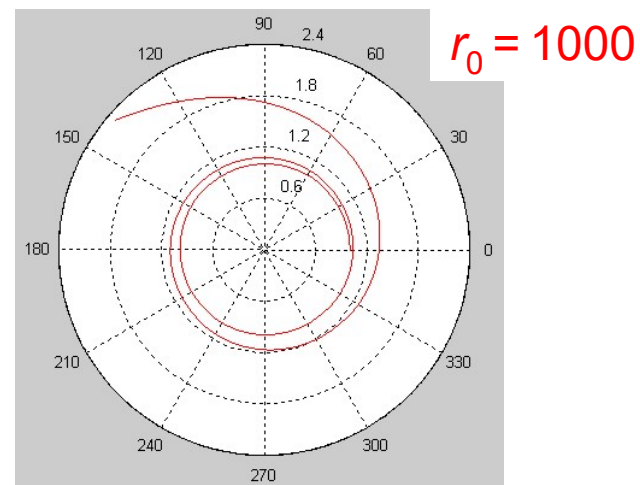

## Results of Numerical Integration - 2

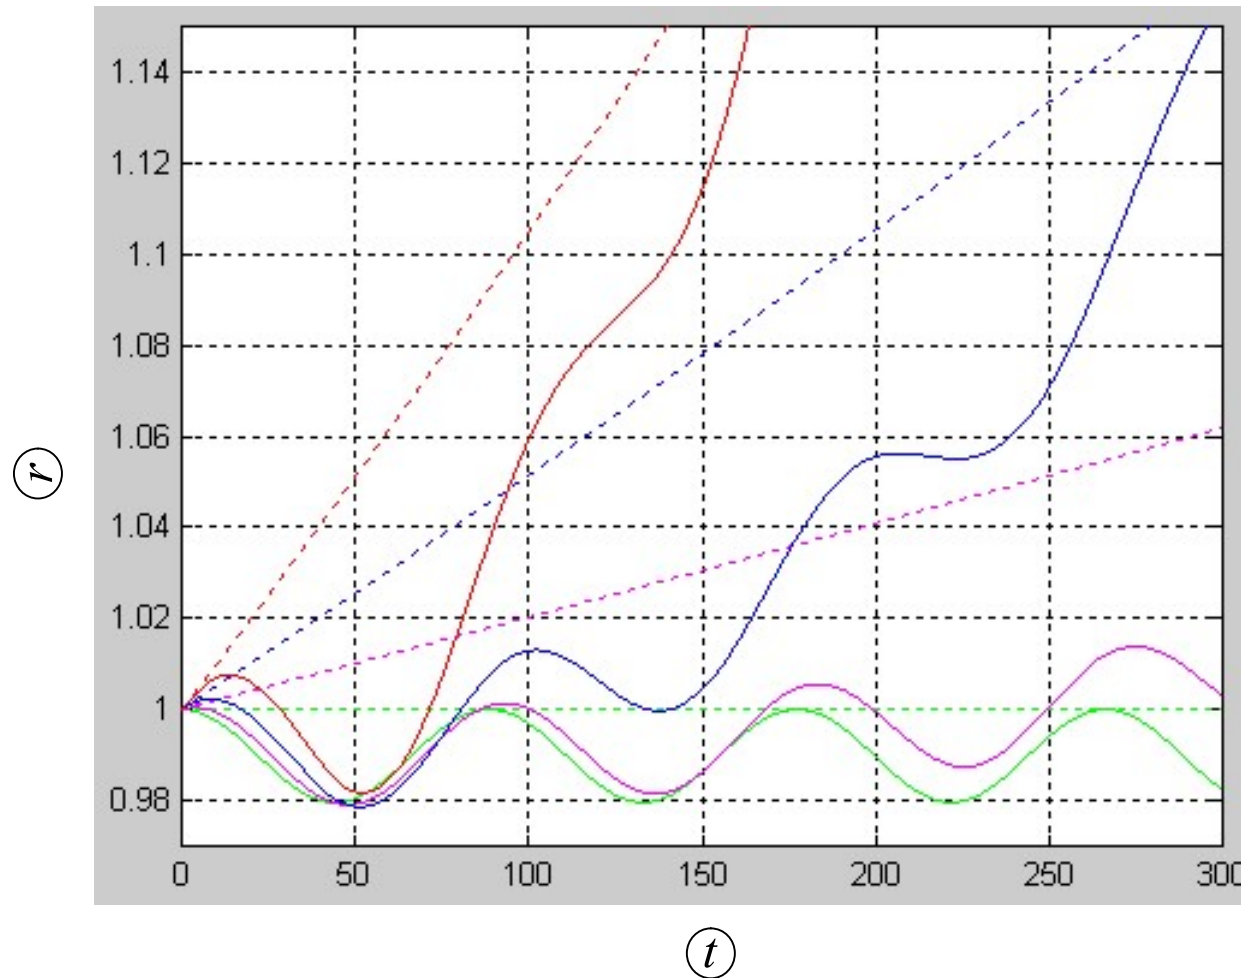

$$r_g = 0.01$$

$$R_0 = 1$$

—  $r_0 = 1000$

—  $r_0 = 2000$

—  $r_0 = 5000$

—  $r_0 = \infty$

Note 1: The curves are wavy because the initial (unperturbed) planetary orbits were taken to be slightly elliptical.

Note 2: Dashed lines represent the standard Hubble flow (unperturbed by the central mass).

- **In certain circumstances, the perturbation caused by the Lambda-term (i.e., Dark Energy) becomes substantial and even can reach the rate of the standard Hubble flow at infinity.**

# Discussion and Summary

- The problem of cosmological effects at the local (e.g., interplanetary) scales is studied already for almost 90 years but still remains a poorly understood subject (especially, in the case of arbitrary energy–momentum tensor and inhomogeneous background matter distribution).
- A theoretical consideration of the two-body problem becomes much simpler and straightforward in the case of the Lambda-dominated cosmological background.
  - However, the analytical perturbation theory is still unavailable.
  - Besides, the numerical calculations encounter the problem of the very different spatial scales involved.
- Numerical treatment of a few toy models shows that:
  - a perturbation of the test body by the Lambda-term begins to increase quickly at certain values of the parameters (i.e., a kind of the instability develops); and
  - the resulting effect can be significant, namely, the rate of secular increase of the orbital radius can reach the rate of the standard Hubble flow at infinity.
- These facts may have important applications to the long-term dynamics of planetary systems and stellar binaries.
